# Supplementary material for: Genome Instability and Long Noncoding RNA Reveal Biomarkers for Immunotherapy and Prognosis and Novel Competing Endogenous RNA Mechanism in Colon Adenocarcinoma
Source: Front Cell Dev Biol. 2021 Oct 20;9:740455. doi: 10.3389/fcell.2021.740455 (PMC8564000; doi:10.3389/fcell.2021.740455)
Supplement: Supplementary file 6 [file Table_3.XLSX]

## Sheet: Sheet1
Table S3 Basic characteristics of included COAD patients
Covariates		Total	Validation cohort	Training cohort	P-value
Survival Status	Dead	350(78.48%)	182(81.98%)	168(75%)	0.0932
	Alive	96(21.52%)	40(18.02%)	56(25%)
Age	<=65	183(41.03%)	94(42.34%)	89(39.73%)	0.6426
	>65	263(58.97%)	128(57.66%)	135(60.27%)
Gender	Female	212(47.53%)	100(45.05%)	112(50%)	0.3407
	Male	234(52.47%)	122(54.95%)	112(50%)
Stage	Stage I	75(16.82%)	37(16.67%)	38(16.96%)	0.7338
	Stage II	175(39.24%)	89(40.09%)	86(38.39%)
	Stage III	124(27.8%)	62(27.93%)	62(27.68%)
	Stage IV	61(13.68%)	26(11.71%)	35(15.62%)
	unknow	11(2.47%)	8(3.6%)	3(1.34%)
T	T1	10(2.24%)	6(2.7%)	4(1.79%)	0.8303
	T2	76(17.04%)	37(16.67%)	39(17.41%)
	T3	303(67.94%)	148(66.67%)	155(69.2%)
	T4	56(12.56%)	30(13.51%)	26(11.61%)
	unknow	1(0.22%)	1(0.45%)	0(0%)
M	M0	329(73.77%)	163(73.42%)	166(74.11%)	0.3931
	M1	61(13.68%)	26(11.71%)	35(15.62%)
	unknow	56(12.56%)	33(14.86%)	23(10.27%)
N	N0	265(59.42%)	136(61.26%)	129(57.59%)	0.2905
	N1	102(22.87%)	53(23.87%)	49(21.88%)
	N2	79(17.71%)	33(14.86%)	46(20.54%)
KRAS	Mutation	170(38.12%)	75(33.78%)	95(42.41%)	0.0776
	Wild	218(48.88%)	117(52.7%)	101(45.09%)
	unknow	58(13%)	30(13.51%)	28(12.5%)
TP53	Mutation	217(48.65%)	104(46.85%)	113(50.45%)	0.5556
	Wild	171(38.34%)	88(39.64%)	83(37.05%)
	unknow	58(13%)	30(13.51%)	28(12.5%)
BRAF	Mutation	58(13%)	27(12.16%)	31(13.84%)	0.7323
	Wild	330(73.99%)	165(74.32%)	165(73.66%)
	unknow	58(13%)	30(13.51%)	28(12.5%)
POLE	Mutation	34(7.62%)	18(8.11%)	16(7.14%)	0.8084
	Wild	354(79.37%)	174(78.38%)	180(80.36%)
	unknow	58(13%)	30(13.51%)	28(12.5%)
TMB	TMB-high	193(43.27%)	94(42.34%)	99(44.2%)	0.8383
	TMB-low	195(43.72%)	98(44.14%)	97(43.3%)
	unknow	58(13%)	30(13.51%)	28(12.5%)
MSI MANTIS score	MSI-high	199(44.62%)	95(42.79%)	104(46.43%)	0.5815
	MSI-low	202(45.29%)	103(46.4%)	99(44.2%)
	unknow	45(10.09%)	24(10.81%)	21(9.38%)
P-value, Chi-square test
