# Supplementary material for: Genome Instability and Long Noncoding RNA Reveal Biomarkers for Immunotherapy and Prognosis and Novel Competing Endogenous RNA Mechanism in Colon Adenocarcinoma
Source: Front Cell Dev Biol. 2021 Oct 20;9:740455. doi: 10.3389/fcell.2021.740455 (PMC8564000; doi:10.3389/fcell.2021.740455)
Supplement: Supplementary file 8 [file Table_5.XLSX]

## Sheet: Sheet1
Table S5 The weight of each lncRNA in SVM and 43 lncRNAs screened by LASSO regression.
id	SVM weight	id-lasso
RARA-AS1	-0.00756254	USP30.AS1
AL354892.2	0.355501	TFAP2A.AS1
AL121829.2	0.0189155	SATB2.AS1
AC091179.1	0.0670545	RHPN1.AS1
AC020659.1	-0.0938904	LOXL1.AS1
AP000785.1	-0.217882	LINC02747
LINC00653	-0.212113	LINC02688
AC110285.3	-0.0673822	LINC02489
AC078993.1	0.0266962	LINC02441
LINC02441	-0.0470313	LINC02418
LINC02826	0.00792122	LINC02041
AL390198.1	0.15268	LINC01807
LINC01315	0.0428327	LINC01443
AC010280.1	-0.350465	LINC00941
AC008514.1	-0.0377537	LINC00653
MIR924HG	0.021876	HAR1B
SATB2-AS1	-0.109187	GAS6.AS1
USP30-AS1	0.144523	DIO3OS
AL390208.1	0.0162508	BOLA3.AS1
AC108865.2	-0.239293	AL357079.1
TFAP2A-AS1	0.281325	AL354892.2
AC136475.9	-0.0243751	AL161772.1
AF127577.3	0.0921071	AL121895.2
AC055717.2	-0.436758	AL121761.1
AC026801.2	0.0254475	AFAP1.AS1
AP005271.1	-0.0276306	AC254629.1
LINC00513	-0.0597971	AC136475.9
AC115522.1	0.144804	AC135388.1
AL022316.1	-0.0191631	AC129492.1
AC009237.15	-0.110343	AC124067.4
LINC01807	-0.301217	AC114296.1
AL590483.1	-0.0528148	AC108134.3
AL355312.3	-0.192236	AC106876.1
ZNF503-AS1	-0.107865	AC103591.3
AC254629.1	0.0004629	AC092112.1
AC124067.4	-0.0811027	AC055717.2
AC090579.1	0.188148	AC017074.1
AC009237.14	-0.0436969	AC010998.3
AL357033.4	0.0593869	AC010280.1
LHFPL3-AS2	-0.0585153	AC009812.1
AC022784.1	-0.142892	AC009237.15
HLA-DQB1-AS1	0.0377269	AC005911.1
LINC00654	-0.281044	AC005256.1
LOXL1-AS1	0.394665
AC005911.1	0.330149
AC005256.1	0.301681
AC010998.3	0.236275
LINC00941	0.225834
LINC02041	0.196769
MIAT	0.175376
AC064807.2	0.169267
AL391056.1	0.156121
LINC01558	0.140414
PTPRD-AS1	0.120022
OSER1-DT	0.109254
SMIM2-AS1	0.104497
AC080129.2	0.0959775
LINC02747	0.0958885
LINC02688	0.0906159
AL139384.1	0.0762989
LINC01443	0.0685017
HAR1B	0.0658584
DPP10-AS1	0.0543825
AL121761.1	0.0492117
BOK-AS1	0.0463467
AC108865.1	0.0415069
AFAP1-AS1	0.0367906
AC007996.1	0.0358107
AC007991.2	0.0337556
LINC02446	0.0332714
AC123023.1	0.0301691
AC005392.2	0.0267971
AC109446.3	0.0240588
AL133370.1	0.0172115
AL162582.1	0.0166465
AC103591.3	0.0121756
AL035661.1	0.00668656
AP003774.2	0.00653914
AL365226.1	0.00295861
AC009812.1	0.00202803
UNC5B-AS1	0.00055878
DLGAP1-AS5	-0.00075312
AL121832.1	-0.00536953
HAS2-AS1	-0.00601611
LINC01082	-0.0130779
LINC01094	-0.0143662
AL157871.2	-0.0182291
AC053503.3	-0.020632
AC129492.1	-0.0241535
AC112484.3	-0.0252318
LINC02487	-0.0260172
TUSC8	-0.0261123
AP004608.1	-0.0262954
ZNF529-AS1	-0.0275208
RHPN1-AS1	-0.0330513
AC093585.1	-0.0475707
AL133520.1	-0.0483388
LINC02489	-0.052971
AC009163.6	-0.0541333
LINC02418	-0.0557294
AL117382.2	-0.0603952
AL121895.2	-0.0619832
BOLA3-AS1	-0.0642967
AC002401.3	-0.0651192
AL022313.2	-0.0877341
AC110772.2	-0.0893299
AC022101.1	-0.0928053
AC004009.1	-0.0977005
AC106876.1	-0.106393
AL357079.1	-0.106949
AC108134.3	-0.124188
AC026336.3	-0.144117
LINC00896	-0.150815
AC017074.1	-0.151286
AC092112.1	-0.156689
GAS6-AS1	-0.16255
LINC02195	-0.165775
LINC00525	-0.16875
AP003555.1	-0.190042
AC135388.1	-0.198712
AL161772.1	-0.242478
DIO3OS	-0.249902
AC114296.1	-0.253468
LINC00543	-0.282889
SVM, Support Vector Machine
LASSO, Least absolute shrinkage and selection operator
